# Supplementary material
Source: publisher figshare collection journal article supplement (https://acs.figshare.com/ndownloader/files/5066626)
Supplement: Supplementary file 1 [file 5066626]

data_global

#===============================================================================

# 1. SUBMISSION DETAILS

_publ_contact_author
;
	Dr. J. F. Malone
	School of Chemistry
	Queen's University of Belfast
	Belfast
	BT9 5AG
	UK
;
_publ_contact_author_phone        '00 44 2890 974349'
_publ_contact_author_email        j.malone@qub.ac.uk

_publ_requested_journal           'Journal of Organic Chemistry'

#===============================================================================

# 2. TITLE AND AUTHOR LIST

_publ_section_title
;
Stereodynamics and Edge-To-Face Aromatic Interactions in Ortho Phenethyl =
Substituted Biphenyls
;

loop_
_publ_author_name

	'Jennings, W. Brian'
;	Department of Chemistry
	University College Cork
	Cork
	Ireland
;
	'Farrell, Brid M.'
;	Department of Chemistry
	University College Cork
	Cork
	Ireland
;
	'Malone, John F.'
;	School of Chemistry
	Queen's University Belfast
	Belfast
	BT9 5AG
	UK
;


#===============================================================================
   
data_3a 
 
_audit_creation_method            SHELXL-97 
_chemical_name_systematic 
; 
 ? 
; 
_chemical_name_common             ? 
_chemical_melting_point           107 
_chemical_formula_moiety          'C25 H22 O'
_chemical_formula_sum             'C25 H22 O' 
_chemical_formula_weight          338.4 
 
loop_ 
 _atom_type_symbol 
 _atom_type_description 
 _atom_type_scat_dispersion_real 
 _atom_type_scat_dispersion_imag 
 _atom_type_scat_source 
 'C'  'C'   0.0181   0.0091 
 'International Tables Vol C Tables 4.2.6.8 and 6.1.1.4' 
 'H'  'H'   0.0000   0.0000 
 'International Tables Vol C Tables 4.2.6.8 and 6.1.1.4' 
 'O'  'O'   0.0492   0.0322 
 'International Tables Vol C Tables 4.2.6.8 and 6.1.1.4' 
 
_symmetry_cell_setting            monoclinic
_symmetry_space_group_name_H-M    P2(1)/c
 
loop_ 
 _symmetry_equiv_pos_as_xyz 
 'x, y, z' 
 '-x, -y, -z' 
 'x, -y+1/2, z+1/2' 
 '-x, y+1/2, -z+1/2' 
 
_cell_length_a                    10.563(2) 
_cell_length_b                    9.546(2) 
_cell_length_c                    19.385(4) 
_cell_angle_alpha                 90.00 
_cell_angle_beta                  105.19(3) 
_cell_angle_gamma                 90.00 
_cell_volume                      1886.4(7) 
_cell_formula_units_Z             4 
_cell_measurement_temperature     293(2) 
_cell_measurement_reflns_used     ? 
_cell_measurement_theta_min       ? 
_cell_measurement_theta_max       ? 
 
_exptl_crystal_description        'blocks' 
_exptl_crystal_colour             colourless 
_exptl_crystal_size_max           ? 
_exptl_crystal_size_mid           ? 
_exptl_crystal_size_min           ? 
_exptl_crystal_density_meas       ? 
_exptl_crystal_density_diffrn     1.192 
_exptl_crystal_density_method     'not measured' 
_exptl_crystal_F_000              720 
_exptl_absorpt_coefficient_mu     0.544
_exptl_absorpt_correction_type    none 
_exptl_absorpt_correction_T_min   ? 
_exptl_absorpt_correction_T_max   ? 
_exptl_absorpt_process_details    ? 
 
_exptl_special_details 
; 
 ? 
; 
 
_diffrn_ambient_temperature       293(2) 
_diffrn_radiation_wavelength      1.54178 
_diffrn_radiation_type            CuK\a 
_diffrn_radiation_source          'fine-focus sealed tube' 
_diffrn_radiation_monochromator   graphite 
_diffrn_measurement_device_type   'Siemens P3 diffractometer' 
_diffrn_measurement_method        'omega scans' 
_diffrn_detector_area_resol_mean  ? 
_diffrn_standards_number          ? 
_diffrn_standards_interval_count  ? 
_diffrn_standards_interval_time   ? 
_diffrn_standards_decay_%         ? 
_diffrn_reflns_number             2509 
_diffrn_reflns_av_R_equivalents   0.0185
_diffrn_reflns_av_sigmaI/netI     0.0112 
_diffrn_reflns_limit_h_min        0
_diffrn_reflns_limit_h_max        10
_diffrn_reflns_limit_k_min        0
_diffrn_reflns_limit_k_max        9
_diffrn_reflns_limit_l_min        -20
_diffrn_reflns_limit_l_max        20 
_diffrn_reflns_theta_min          5.33 
_diffrn_reflns_theta_max          54.95 
_reflns_number_total              2355 
_reflns_number_gt                 1760 
_reflns_threshold_expression      >2sigma(I) 
 
_computing_data_collection        'Siemens P3/V2000' 
_computing_cell_refinement        'Siemens P3/V2000'
_computing_data_reduction         'Siemens P3/V2000' 
_computing_structure_solution     'SHELXS-97 (Sheldrick, 1990)' 
_computing_structure_refinement   'SHELXL-97 (Sheldrick, 1997)' 
_computing_molecular_graphics     'Bruker SHELXTL' 
_computing_publication_material   'SHELXL-97; enCIFer (CCDC, 2000) '
 
_refine_special_details 
; 
 Refinement of F^2^ against ALL reflections.  The weighted R-factor wR and 
 goodness of fit S are based on F^2^, conventional R-factors R are based 
 on F, with F set to zero for negative F^2^. The threshold expression of 
 F^2^ > 2sigma(F^2^) is used only for calculating R-factors(gt) etc. and is 
 not relevant to the choice of reflections for refinement.  R-factors based 
 on F^2^ are statistically about twice as large as those based on F, and R- 
 factors based on ALL data will be even larger. 
; 
 
_refine_ls_structure_factor_coef  Fsqd  
_refine_ls_matrix_type            full 
_refine_ls_weighting_scheme       calc  
_refine_ls_weighting_details 
 'calc w=1/[\s^2^(Fo^2^)+(0.0567P)^2^+0.1565P] where P=(Fo^2^+2Fc^2^)/3' 
_atom_sites_solution_primary      direct 
_atom_sites_solution_secondary    difmap 
_atom_sites_solution_hydrogens    difmap 
_refine_ls_hydrogen_treatment     mixed 
_refine_ls_extinction_method      SHELXL 
_refine_ls_extinction_coef        0.0097(6)
_refine_ls_extinction_expression  
 'Fc^*^=kFc[1+0.001xFc^2^\l^3^/sin(2\q)]^-1/4^' 
_refine_ls_number_reflns          2355
_refine_ls_number_parameters      238
_refine_ls_number_restraints      0
_refine_ls_R_factor_all           0.0635
_refine_ls_R_factor_gt            0.0455
_refine_ls_wR_factor_ref          0.1229
_refine_ls_wR_factor_gt           0.1118
_refine_ls_goodness_of_fit_ref    1.068
_refine_ls_restrained_S_all       1.067
_refine_ls_shift/su_max           0.000 
_refine_ls_shift/su_mean          0.000 
 
loop_ 
 _atom_site_label 
 _atom_site_type_symbol 
 _atom_site_fract_x 
 _atom_site_fract_y 
 _atom_site_fract_z 
 _atom_site_U_iso_or_equiv 
 _atom_site_adp_type 
 _atom_site_occupancy 
 _atom_site_symmetry_multiplicity 
 _atom_site_calc_flag 
 _atom_site_refinement_flags 
 _atom_site_disorder_assembly 
 _atom_site_disorder_group 
O1 O 0.5965(2) 0.5497(3) 0.0627(1) 0.0488(5) Uani 1 1 d . . . 
H1 H 0.6023 0.4691 0.0492 0.073 Uiso 1 1 calc R . . 
C1 C 0.6375(2) 0.3333(2) 0.1599(1) 0.0381(6) Uani 1 1 d . . . 
C2 C 0.6553(3) 0.2256(3) 0.1165(1) 0.0472(7) Uani 1 1 d . . . 
H2 H 0.7359 0.2157 0.1060 0.057 Uiso 1 1 calc R . . 
C3 C 0.5543(3) 0.1301(3) 0.0876(1) 0.0596(8) Uani 1 1 d . . . 
H3 H 0.5676 0.0588 0.0576 0.072 Uiso 1 1 calc R . . 
C4 C 0.4370(3) 0.1419(3) 0.1036(1) 0.0593(8) Uani 1 1 d . . . 
H4 H 0.3711 0.0773 0.0848 0.071 Uiso 1 1 calc R . . 
C5 C 0.4132(2) 0.2501(3) 0.1480(1) 0.0491(7) Uani 1 1 d . . . 
C6 C 0.2913(3) 0.2644(4) 0.1656(2) 0.0692(9) Uani 1 1 d . . . 
H6 H 0.2253 0.1989 0.1488 0.083 Uiso 1 1 calc R . . 
C7 C 0.2705(3) 0.3724(4) 0.2065(2) 0.0768(10) Uani 1 1 d . . . 
H7 H 0.1899 0.3807 0.2171 0.092 Uiso 1 1 calc R . . 
C8 C 0.3679(3) 0.4710(4) 0.2328(1) 0.0687(9) Uani 1 1 d . . . 
H8 H 0.3519 0.5454 0.2603 0.082 Uiso 1 1 calc R . . 
C9 C 0.4867(2) 0.4586(3) 0.2184(1) 0.0536(7) Uani 1 1 d . . . 
H9 H 0.5515 0.5245 0.2370 0.064 Uiso 1 1 calc R . . 
C10 C 0.5140(2) 0.3486(2) 0.1761(1) 0.0405(6) Uani 1 1 d . . . 
C11 C 0.7515(2) 0.4252(2) 0.1950(1) 0.0375(6) Uani 1 1 d . . . 
C12 C 0.7955(2) 0.5413(3) 0.1638(1) 0.0399(6) Uani 1 1 d . . . 
C13 C 0.9101(2) 0.6073(3) 0.2022(1) 0.0523(7) Uani 1 1 d . . . 
H13 H 0.9421 0.6826 0.1814 0.063 Uiso 1 1 calc R . . 
C14 C 0.9779(2) 0.5654(3) 0.2699(1) 0.0565(8) Uani 1 1 d . . . 
H14 H 1.0545 0.6113 0.2939 0.068 Uiso 1 1 calc R . . 
C15 C 0.93121(3) 0.4554(3) 0.3015(1) 0.0537(7) Uani 1 1 d . . . 
H15 H 0.9740 0.4283 0.3479 0.064 Uiso 1 1 calc R . . 
C16 C 0.8209(2) 0.3857(3) 0.2643(1) 0.0480(7) Uani 1 1 d . . . 
H16 H 0.7912 0.3097 0.2857 0.058 Uiso 1 1 calc R . . 
C17 C 0.7247(2) 0.6061(2) 0.0910(1) 0.0439(6) Uani 1 1 d . . . 
C18 C 0.8070(3) 0.5890(3) 0.0361(1) 0.0537(7) Uani 1 1 d . . . 
H18A H 0.7659 0.6428 -0.0063 0.064 Uiso 1 1 calc R . . 
H18B H 0.8934 0.6286 0.0564 0.064 Uiso 1 1 calc R . . 
C19 C 0.8230(2) 0.4405(3) 0.0143(1) 0.0481(7) Uani 1 1 d . . . 
C20 C 0.7302(3) 0.3787(3) -0.0419(1) 0.0589(8) Uani 1 1 d . . . 
H20 H 0.6591 0.4313 -0.0673 0.071 Uiso 1 1 calc R . . 
C21 C 0.7417(3) 0.2409(4) -0.0607(2) 0.0732(9) Uani 1 1 d . . . 
H21 H 0.6785 0.2016 -0.0984 0.088 Uiso 1 1 calc R . . 
C22 C 0.8465(3) 0.1614(3) -0.0239(2) 0.0745(9) Uani 1 1 d . . . 
H22 H 0.8540 0.0683 -0.0364 0.089 Uiso 1 1 calc R . . 
C23 C 0.9399(3) 0.2205(3) 0.0314(2) 0.0689(8) Uani 1 1 d . . . 
H23 H 1.0110 0.1673 0.0563 0.083 Uiso 1 1 calc R . . 
C24 C 0.9286(3) 0.3585(3) 0.0501(1) 0.0568(8) Uani 1 1 d . . . 
H24 H 0.9929 0.3975 0.0874 0.068 Uiso 1 1 calc R . .
C25 C 0.6987(3) 0.7618(3) 0.1009(2) 0.0785(8) Uani 1 1 d . . . 
H25A H 0.6497 0.8007 0.0562 0.098 Uiso 1 1 calc R . . 
H25B H 0.7807 0.8104 0.1170 0.098 Uiso 1 1 calc R . . 
H25C H 0.6493 0.7718 0.1358 0.098 Uiso 1 1 calc R . . 

loop_ 
 _atom_site_aniso_label 
 _atom_site_aniso_U_11 
 _atom_site_aniso_U_22 
 _atom_site_aniso_U_33 
 _atom_site_aniso_U_23 
 _atom_site_aniso_U_13 
 _atom_site_aniso_U_12 
O1 0.041(1) 0.054(1) 0.047(1) -0.001(1) 0.002(1) -0.000(1) 
C1 0.044(1) 0.035(1) 0.035(1) 0.001(1) 0.009(1) -0.001(1)
C2 0.055(2) 0.042(1) 0.044(1) -0.002(1) 0.011(1) 0.001(1)
C3 0.081(2) 0.041(2) 0.050(2) -0.008(1) 0.004(1) -0.002(2)
C4 0.061(2) 0.048(2) 0.060(2) 0.003(1) -0.001(1) -0.019(1)
C5 0.047(2) 0.053(2) 0.043(1) 0.009(1) 0.004(1) -0.010(1)
C6 0.048(2) 0.096(3) 0.059(2) 0.021(2) 0.005(1) -0.022(2)
C7 0.047(2) 0.128(3) 0.059(2) 0.013(2) 0.020(2) 0.002(2)
C8 0.053(2) 0.103(2) 0.053(2) -0.009(2) 0.018(1) 0.010(2)
C9 0.047(2) 0.068(2) 0.045(1) -0.006(1) 0.011(1) 0.000(1)
C10 0.042(1) 0.046(2) 0.032(1) 0.006(1) 0.008(1) -0.002(1)
C11 0.036(1) 0.037(1) 0.039(1) -0.003(1) 0.008(1) 0.002(1)
C12 0.034(1) 0.043(1) 0.041(1) -0.004(1) 0.007(1) -0.001(1)
C13 0.044(1) 0.053(2) 0.057(2) -0.000(1) 0.006(1) -0.010(1)
C14 0.038(1) 0.064(2) 0.060(2) -0.012(1) -0.001(1) -0.006(1)
C15 0.050(2) 0.062(2) 0.042(1) -0.007(1) -0.001(1) 0.011(1)
C16 0.051(2) 0.050(2) 0.041(1) 0.003(1) 0.009(1) 0.0031(1)
C17 0.045(1) 0.040(1) 0.045(1) 0.002(1) 0.007(1) -0.005(1)
C18 0.060(2) 0.055(2) 0.046(1) 0.010(1) 0.014(1) -0.007(1)
C19 0.047(1) 0.060(2) 0.041(1) 0.005(1) 0.018(1) -0.003(1)
C20 0.056(2) 0.074(2) 0.044(2) -0.002(1) 0.009(1) 0.004(1)
C21 0.073(2) 0.081(2) 0.064(2) -0.025(2) 0.015(2) -0.001(2)
C22 0.076(2) 0.068(2) 0.087(2) -0.016(2) 0.034(2) 0.008(2) 
C23 0.055(2) 0.075(2) 0.081(2) 0.003(2) 0.026(2) 0.014(2) 
C24 0.043(2) 0.073(2) 0.055(2) 0.001(2) 0.014(1) -0.004(1) 
C25 0.082(2) 0.041(2) 0.064(2) 0.002(1) 0.005(2) 0.008(1) 

_geom_special_details 
; 
 All esds (except the esd in the dihedral angle between two l.s. planes) 
 are estimated using the full covariance matrix.  The cell esds are taken 
 into account individually in the estimation of esds in distances, angles 
 and torsion angles; correlations between esds in cell parameters are only 
 used when they are defined by crystal symmetry.  An approximate (isotropic) 
 treatment of cell esds is used for estimating esds involving l.s. planes. 
; 
 
loop_ 
 _geom_bond_atom_site_label_1 
 _geom_bond_atom_site_label_2 
 _geom_bond_distance 
 _geom_bond_site_symmetry_2 
 _geom_bond_publ_flag 
O1 C17 1.427(3) . ? 
C1 C2 1.372(3) . ? 
C1 C10 1.427(3) . ? 
C1 C11 1.501(3) . ? 
C2 C3 1.404(3) . ? 
C3 C4 1.357(4) . ? 
C4 C5 1.409(4) . ? 
C5 C10 1.418(3) . ? 
C5 C6 1.422(4) . ? 
C6 C7 1.353(4) . ? 
C7 C8 1.389(4) . ? 
C8 C9 1.360(4) . ? 
C9 C10 1.409(3) . ? 
C11 C16 1.403(3) . ? 
C11 C12 1.400(3) . ? 
C12 C13 1.395(3) . ? 
C12 C17 1.543(3) . ? 
C13 C14 1.380(3) . ? 
C14 C15 1.371(4) . ? 
C15 C16 1.371(3) . ? 
C17 C25 1.532(3) . ? 
C17 C18 1.548(4) . ? 
C18 C19 1.503(3) . ? 
C19 C24 1.390(3) . ? 
C19 C20 1.391(3) . ? 
C20 C21 1.378(4) . ? 
C21 C22 1.377(4) . ? 
C22 C23 1.374(4) . ? 
C23 C24 1.380(8) . ? 
 
loop_ 
 _geom_angle_atom_site_label_1 
 _geom_angle_atom_site_label_2 
 _geom_angle_atom_site_label_3 
 _geom_angle 
 _geom_angle_site_symmetry_1 
 _geom_angle_site_symmetry_3 
 _geom_angle_publ_flag 
C2 C1 C10 119.5(2) . . ? 
C2 C1 C11 119.6(2) . . ? 
C10 C1 C11 120.7(2) . . ? 
C1 C2 C3 121.3(3) . . ? 
C4 C3 C2 120.0(3) . . ? 
C3 C4 C5 121.3(2) . . ? 
C4 C5 C10 119.0(2) . . ? 
C4 C5 C6 122.4(3) . . ? 
C10 C5 C6 118.7(3) . . ? 
C7 C6 C5 120.7(3) . . ? 
C6 C7 C8 120.8(3) . . ? 
C9 C8 C7 120.0(3) . . ? 
C8 C9 C10 121.7(3) . . ? 
C9 C10 C5 118.0(2) . . ? 
C9 C10 C1 122.9(2) . . ? 
C5 C10 C1 119.0(2) . . ? 
C16 C11 C12 118.5(2) . . ? 
C16 C11 C1 115.7(2) . . ? 
C12 C11 C1 125.8(2) . . ? 
C13 C12 C11 117.8(2) . . ? 
C13 C12 C17 116.9(2) . . ? 
C11 C12 C17 125.2(2) . . ? 
C14 C13 C12 122.6(3) . . ? 
C13 C14 C15 119.3(2) . . ? 
C16 C15 C14 119.5(2) . . ? 
C15 C16 C11 122.1(2) . . ? 
O1 C17 C12 112.5(2) . . ? 
O1 C17 C25 103.3(2) . . ? 
C12 C17 C25 109.5(2) . . ? 
O1 C17 C18 110.2(2) . . ? 
C12 C17 C18 111.1(2) . . ? 
C25 C17 C18 109.9(2) . . ? 
C19 C18 C17 114.7(2) . . ? 
C24 C19 C20 117.5(3) . . ? 
C24 C19 C18 121.7(2) . . ? 
C20 C19 C18 120.9(2) . . ? 
C21 C20 C19 121.2(3) . . ? 
C22 C21 C20 120.2(3) . . ? 
C23 C22 C21 119.6(3) . . ? 
C22 C23 C24 120.2(3) . . ? 
C19 C24 C23 121.3(3) . . ? 
 
loop_ 
 _geom_torsion_atom_site_label_1 
 _geom_torsion_atom_site_label_2 
 _geom_torsion_atom_site_label_3 
 _geom_torsion_atom_site_label_4 
 _geom_torsion 
 _geom_torsion_site_symmetry_1 
 _geom_torsion_site_symmetry_2 
 _geom_torsion_site_symmetry_3 
 _geom_torsion_site_symmetry_4 
 _geom_torsion_publ_flag 
C10 C1 C2 C3 0.1(3) . . . . ? 
C11 C1 C2 C3 174.5(2) . . . . ? 
C1 C2 C3 C4 -1.2(4) . . . . ? 
C2 C3 C4 C5 1.0(4) . . . . ? 
C3 C4 C5 C10 0.3(4) . . . . ? 
C3 C4 C5 C6 -179.8(3) . . . . ? 
C4 C5 C6 C7 -177.8(3) . . . . ? 
C10 C5 C6 C7 2.1(4) . . . . ? 
C5 C6 C7 C8 -0.6(4) . . . . ? 
C6 C7 C8 C9 -0.9(5) . . . . ? 
C7 C8 C9 C10 1.0(4) . . . . ? 
C8 C9 C10 C5 0.5(4) . . . . ? 
C8 C9 C10 C1 179.7(2) . . . . ? 
C4 C5 C10 C9 177.9(2) . . . . ? 
C6 C5 C10 C9 -1.9(3) . . . . ? 
C4 C5 C10 C1 -1.4(3) . . . . ? 
C6 C5 C10 C1 178.7(2) . . . . ? 
C2 C1 C10 C9 -178.1(2) . . . . ? 
C11 C1 C10 C9 7.6(3) . . . . ? 
C2 C1 C10 C5 1.2(3) . . . . ? 
C11 C1 C10 C5 -173.1(2) . . . . ? 
C2 C1 C11 C16 -93.7(3) . . . . ? 
C10 C1 C11 C16 80.6(3) . . . . ? 
C2 C1 C11 C12 83.9(3) . . . . ? 
C10 C1 C11 C12 -101.8(3) . . . . ? 
C16 C11 C12 C13 3.0(3) . . . . ? 
C1 C11 C12 C13 -174.5(2) . . . . ? 
C16 C11 C12 C17 -174.6(2) . . . . ? 
C1 C11 C12 C17 7.8(4) . . . . ? 
C11 C12 C13 C14 -2.2(4) . . . . ? 
C17 C12 C13 C14 175.7(2) . . . . ? 
C12 C13 C14 C15 -0.6(4) . . . . ? 
C13 C14 C15 C16 2.5(4) . . . . ? 
C14 C15 C16 C11 -1.6(4) . . . . ? 
C12 C11 C16 C15 -1.2(4) . . . . ? 
C1 C11 C16 C15 176.6(2) . . . . ? 
C13 C12 C17 O1 -168.1(2) . . . . ? 
C11 C12 C17 O1 9.6(3) . . . . ? 
C13 C12 C17 C25 -53.8(3) . . . . ? 
C11 C12 C17 C25 124.0(3) . . . . ? 
C13 C12 C17 C18 67.9(3) . . . . ? 
C11 C12 C17 C18 -114.5(3) . . . . ? 
O1 C17 C18 C19 -58.7(3) . . . . ? 
C12 C17 C18 C19 66.7(3) . . . . ? 
C25 C17 C18 C19 -171.9(2) . . . . ? 
C17 C18 C19 C24 -91.4(3) . . . . ?
C17 C18 C19 C20 87.1(3) . . . . ? 
C24 C19 C20 C21 0.8(4) . . . . ? 
C18 C19 C20 C21 -177.7(2) . . . . ? 
C19 C20 C21 C22 -0.1(4) . . . . ? 
C20 C21 C22 C23 -0.4(5) . . . . ? 
C21 C22 C23 C24 0.2(4) . . . . ? 
C20 C19 C24 C23 -1.0(4) . . . . ? 
C18 C19 C24 C23 177.5(2) . . . . ? 
C22 C23 C24 C19 0.5(4) . . . . ? 
 
_diffrn_measured_fraction_theta_max    0.925
_diffrn_reflns_theta_full              54.95 
_diffrn_measured_fraction_theta_full   0.925
_refine_diff_density_max    0.145
_refine_diff_density_min    0.129
_refine_diff_density_rms    0.031 
